# Supplementary material for: Factors Associated With Community Health Worker Performance Differ by Task in a Multi-Tasked Setting in Rural Zimbabwe
Source: PubMed Central journal article supplement (PMC4982248; doi:10.9745/ghsp-d-16-00003), 2016-06-20
Supplement: 16-00003-Kambarami-Supplementary-Table-1.pdf [file 16-00003-Kambarami-Supplementary-Table-1.pdf]

Kambarami RA, Mbuya MNN, Pelletier D, Fundira D, Tavengwa NV, Stoltzfus RJ. Factors associated with community health worker performance differ by task in a multi-tasked setting in rural Zimbabwe. *Glob Health Sci Pract.* 2016;4(2). <http://dx.doi.org/10.9745/GHSP-D-16-00003>

### **SUPPLEMENTARY TABLE 1. Key Differences Between CHW Tasks**

| <b>Pregnancy Referrals</b>                                                                     | <b>Lesson Delivery</b>                                                                                    |
|------------------------------------------------------------------------------------------------|-----------------------------------------------------------------------------------------------------------|
| New activity in community                                                                      | Common activity in community                                                                              |
| Cultural sensitivity for activity                                                              | Culturally acceptable                                                                                     |
| Visit all homesteads in CHW catchment area every 5 weeks covering seasonally difficult terrain | Visit all SHINE homesteads at least once a month (scheduled visits) covering seasonally difficult terrain |
| Instruct women how to use and interpret pregnancy tests                                        | Provide demonstrations and use lesson books for visits                                                    |
| Social prestige is likely due to pregnancy test kits and visibility                            | Fatigue is likely because it is a common activity                                                         |
| Similar procedure for all visits                                                               | Different lessons at every visit                                                                          |
| Relatively quick visit (~10 minutes)                                                           | Longer visits (~60 minutes)                                                                               |
| Delivered to women of childbearing age in the household                                        | Delivered to SHINE women and occasionally other household members                                         |

Abbreviations: SHINE, Sanitation Hygiene and Infant Nutrition Efficacy; CHW, community health worker.
