# Supplementary material for: Factors Associated With Community Health Worker Performance Differ by Task in a Multi-Tasked Setting in Rural Zimbabwe
Source: Glob Health Sci Pract. 2016 Jun 20;4(2):238–50. doi: 10.9745/GHSP-D-16-00003 (PMC4982248; doi:10.9745/GHSP-D-16-00003)
Supplement: Supplementary Table 1 [file 16-00003-Kambarami-Supplementary-Table-2.pdf]

**SUPPLEMENTARY TABLE 2.** Multilevel Interaction Model Showing CHW Demographic and Work Characteristic Factors Associated With CHW Performance on Pregnancy Referrals and Behavior Change Lesson Delivery Tasks

| CHW Variables                              | Pregnancy Referrals<br>(N=246) |         | Lesson Delivery Score<br>(N=246) |         | Interaction<br>Term |
|--------------------------------------------|--------------------------------|---------|----------------------------------|---------|---------------------|
|                                            | Beta (SE)                      | P Value | Beta (SE)                        | P Value | P Value             |
| Age, years (reference: <40)                |                                |         |                                  |         |                     |
| 40–49                                      | -0.24 (0.14)                   | .08     | 0.07 (0.14)                      | .63     | .60                 |
| ≥ 50                                       | -0.27 (0.19)                   | .14     | -0.14 (0.19)                     | .45     | .42                 |
| Gender (reference: male)                   | 0.31 (0.14)                    | .02     | -0.17 (0.14)                     | .23     | .01*                |
| Marital status (reference: not married)    | -0.14 (0.14)                   | .30     | 0.01 (0.14)                      | .97     | .42                 |
| Educational level (reference: primary)     |                                |         |                                  |         |                     |
| Some secondary                             | 0.11 (0.11)                    | .53     | 0.06 (0.17)                      | .73     | .36                 |
| Completed “O” Level <sup>a</sup> or higher | 0.01 (0.19)                    | .98     | 0.24 (0.19)                      | .20     | .12                 |
| Household size                             | 0.02 (0.02)                    | .30     | -0.04 (0.02)                     | .09     | .04*                |
| Tenure, years                              | 0.02 (0.01)                    | .09     | -0.02 (0.01)                     | .05     | .008**              |
| Job satisfaction and motivation            | -0.12 (0.08)                   | .12     | -0.07 (0.08)                     | .34     | .66                 |
| Satisfaction with remuneration             | -0.12 (0.07)                   | .07     | 0.02 (0.07)                      | .74     | .11                 |
| Perceived peer support                     | -0.05 (0.06)                   | .46     | -0.04 (0.06)                     | .57     | .90                 |
| Perceived supportive supervision           | 0.02 (0.09)                    | .82     | 0.17 (0.09)                      | .046    | .19                 |
| Perceived operational supervision          | 0.04 (0.07)                    | .53     | -0.15 (0.07)                     | .03     | .04*                |
| Perceived adequacy of resources for work   | 0.13 (0.06)                    | .03     | -0.02 (0.06)                     | .73     | .07 <sup>§</sup>    |
| Perceived negative feedback                | 0.00 (0.06)                    | .99     | -0.09 (0.06)                     | .14     | .28                 |
| Perceived positive feedback                | 0.15 (0.08)                    | .06     | 0.03 (0.08)                      | .71     | .26                 |

Abbreviations: SE, standard error; CHW, community health worker.

Models adjusted for study arm, cluster ID, ward number, and number of observations per CHW.

Interaction terms significant at: <sup>§</sup> $P < .10$ ; \* $P < .05$ ; \*\* $P < .01$ ; \*\*\* $P < .001$ .

<sup>a</sup> Ordinary, or “O”, Level certificate examination is a terminal examination taken after 4 years of secondary education.
